# Supplementary material for: Sequential Organ Failure Assessment (SOFA) Score for predicting mortality in patients with sepsis in Vietnamese intensive care units: a multicentre, cross-sectional study
Source: HighWire-hosted journal article supplement (doi:10.1136/bmjopen-2022-064870), 2023-03-01
Supplement: bmjopen-2022-064870supp002_data_supplement.pdf [file bmjopen-2022-064870supp002_data_supplement.pdf]

## ICU Questionnaire

Please fill in all blanks before submission

Name of person entering data: \_\_\_\_\_

Country: \_\_\_\_\_ Hospital: \_\_\_\_\_ ICU: \_\_\_\_\_

Type of hospital (tick one):  Rural  Urban  
University or university-affiliated hospital (tick one):  Yes  No

*\* Rural is defined as non-metropolitan areas, catering to patients not in the city as defined by the country's healthcare system*

Number of beds in hospital: \_\_\_\_\_ Type of ICU (tick one):  Medical  
 Surgical  
 Mixed medical & surgical  
 Others (excluding paediatric, coronary and neurosurgical ICUs)  
Number of beds in ICU: \_\_\_\_\_

Nurse to ICU patient ratio (Tick one; only 1 choice allowed, choose the ratio most frequently seen in your ICU)

- 1 or more nurses : 1 patient
- 1 nurse : 2 patients
- 1 nurse : 3 patients
- 1 nurse : 4 or more patients

Nature of ICU (Tick one; only 1 choice allowed)

- Closed ICU = All patients are cared for by 1 team of intensivists in collaboration with a primary service. Only intensivists have admitting privileges to the ICU
- Open ICU = Any physician can admit patients to the ICU. The primary service (not intensivists) takes main responsibility for care of patients. If an ICU functions as an open ICU some of the time, and as a closed ICU some of the time, please tick "Open ICU"

Only for closed ICUs: Intensivist to ICU patient ratio (Tick one; only 1 choice allowed, choose the ratio most frequently seen in your ICU)

- 1 intensivist : 5 or fewer patients
- 1 intensivist: 6 to 8 patients
- 1 intensivist: 9 to 11 patients
- 1 intensivist: 12 to 14 patients
- 1 intensivist: 15 or more patients

Is the ICU part of an accredited intensive care fellowship programme? (Tick one)

- Yes
- No

---

**Society of Intensive Care Medicine (Singapore) Secretariat**  
c/o Wizlink Consulting Pte Ltd

Vision Exchange, 2 Venture Drive, #16-16, Singapore 608526

Tel: (65) 6774 5201 • Fax: (65) 6774 5203 • Website: [www.sicm.org.sg](http://www.sicm.org.sg) • Email: [secretariat@sicm.org.sg](mailto:secretariat@sicm.org.sg)

## Capabilities (Tick all that apply)

- Able to perform routine blood, urine, stool, CSF, synovial, fluid cultures
- Able to process AFB smear and cultures
- Able to perform PCR testing for tuberculosis
- Able to perform serology or PCR testing for dengue
- Able to perform serology or PCR testing for influenza
- Able to test for galactomannan
- Able to perform blood film identification for malaria

## Possible additional practices in the general ward outside of the ICU and outside of any high dependency or intermediate care ward or dialysis unit (Tick all that apply)

- Able to support patients on noninvasive ventilation in the general ward
- Able to support patients on invasive mechanical ventilation in the general ward
- Able to support patients on vasopressor/inotrope infusions in the general ward
- Able to support patients on dialysis/renal replacement therapy in the general ward

Please send completed form to: Wizlink Consulting Pte Ltd  
Vision Exchange, #16-16  
2 Venture Drive  
Singapore 608526

---

**Society of Intensive Care Medicine (Singapore) Secretariat**  
c/o Wizlink Consulting Pte Ltd

Vision Exchange, 2 Venture Drive, #16-16, Singapore 608526

Tel: (65) 6774 5201 • Fax: (65) 6774 5203 • Website: [www.sicm.org.sg](http://www.sicm.org.sg) • Email: [secretariat@sicm.org.sg](mailto:secretariat@sicm.org.sg)
